# Supplementary material for: Tuning catalytic performance of platinum single atoms by choosing the shape of cerium dioxide supports
Source: Royal Society of Chemistry journal article supplement (doi:10.1039/d4cy00484a), 2024-01-01
Supplement: d4cy00484a1.pdf [file d4cy00484a1.pdf]

**Table of contents**

|    |                                                                      |    |
|----|----------------------------------------------------------------------|----|
| 1. | Scanning electron microscopy .....                                   | 1  |
| 2. | Nitrogen physisorption.....                                          | 2  |
| 3. | Additional calculations surface content platinum.....                | 5  |
| 4. | X-ray photoelectron spectroscopy .....                               | 6  |
| 5. | X-ray absorption spectroscopy .....                                  | 9  |
| 6. | CO diffuse reflectance infrared Fourier transform spectroscopy ..... | 10 |
| 7. | Kinetic studies of ammonia borane hydrolysis .....                   | 12 |

### 1. Scanning electron microscopy

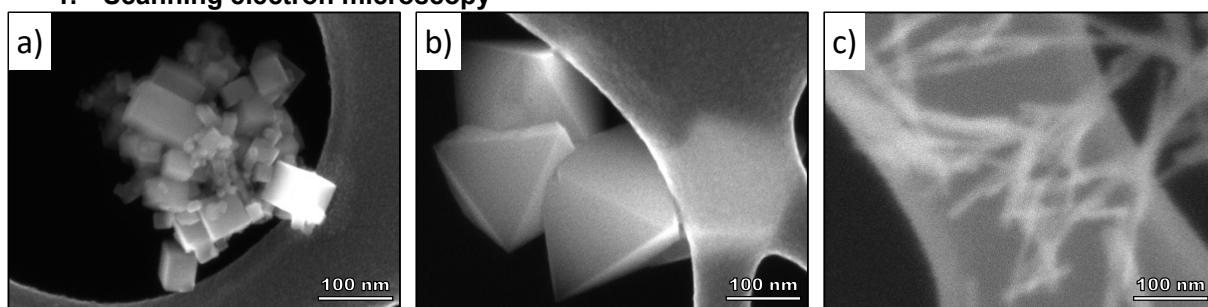

**Figure S1.** Scanning electron microscope (SEM) images of CeO<sub>2</sub> (a) cubes, (b) octahedra and (c) rods.

## 2. Nitrogen physisorption

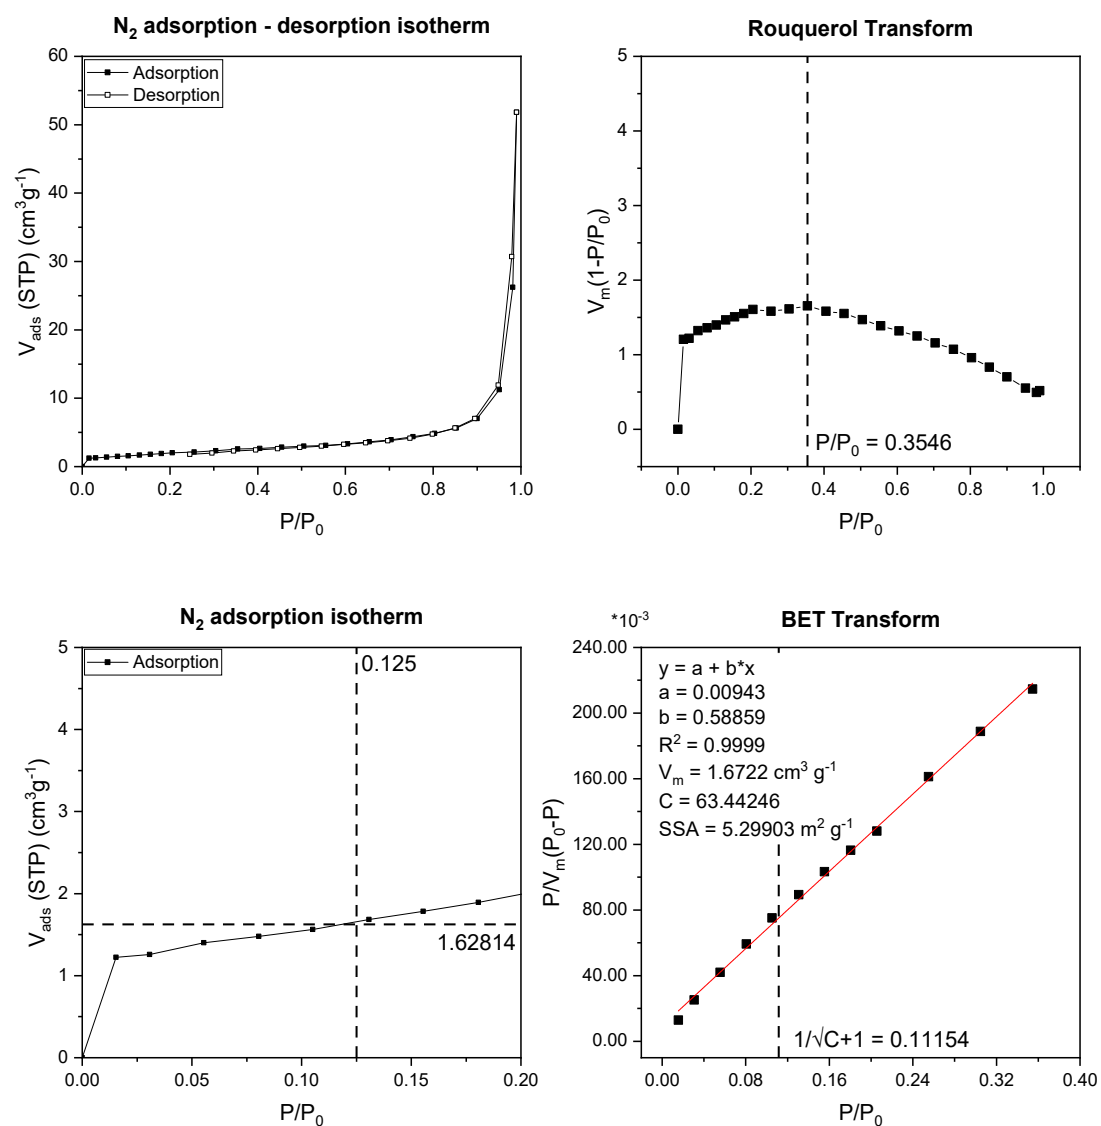

**Figure S2.** Porosity analysis of CeO<sub>2</sub> cubes. a) N<sub>2</sub> adsorption and desorption isotherms at 77 K; b) Rouquerol transform plot; c) zoom-in of the N<sub>2</sub> adsorption isotherm at 77 K and d) BET transform plot.

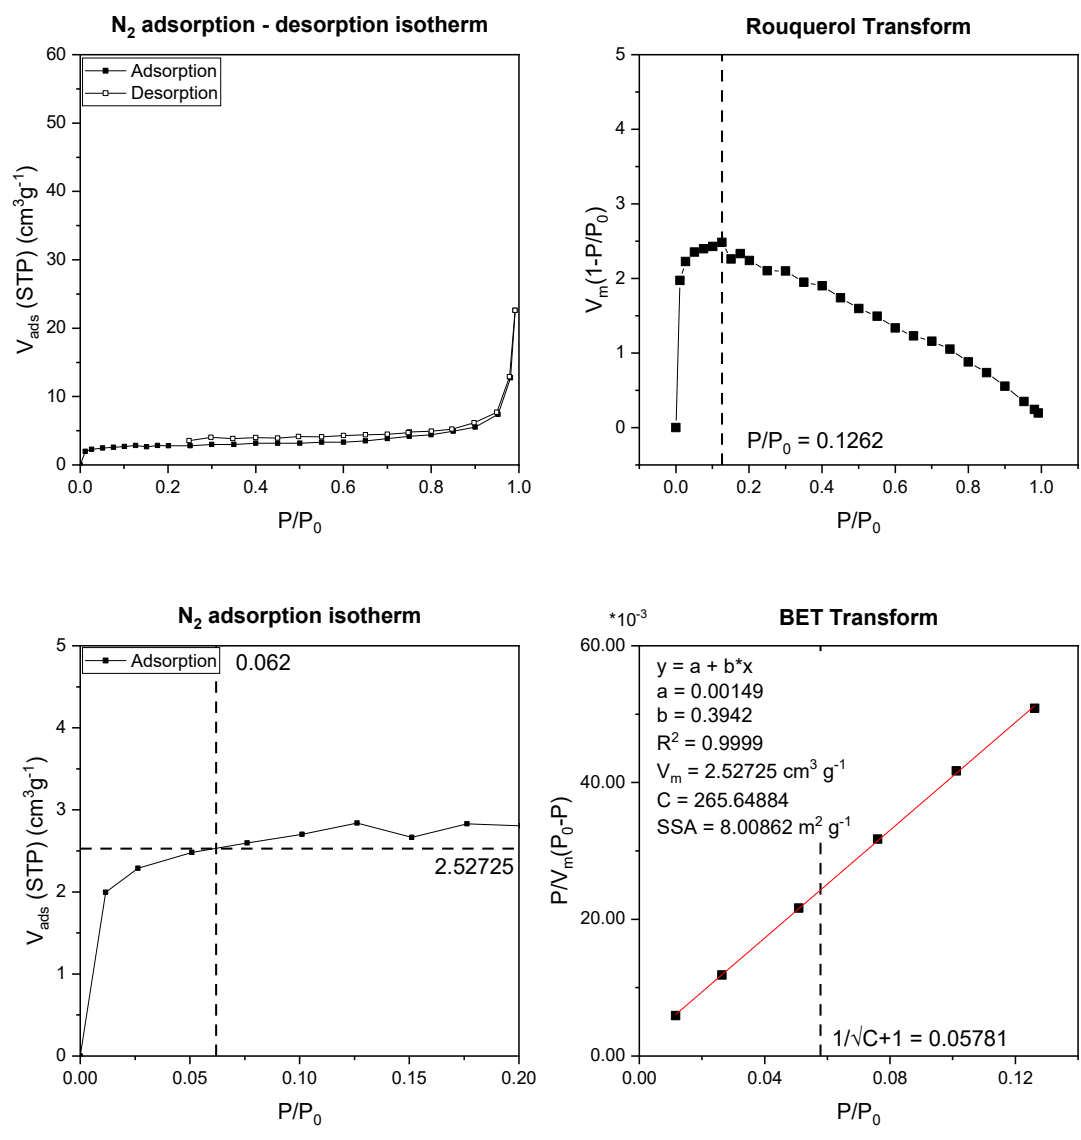

**Figure S3.** Porosity analysis of CeO<sub>2</sub> octahedra. a) N<sub>2</sub> adsorption and desorption isotherms at 77 K; b) Rouquerol transform plot; c) zoom-in of the N<sub>2</sub> adsorption isotherm at 77 K and d) BET transform plot.

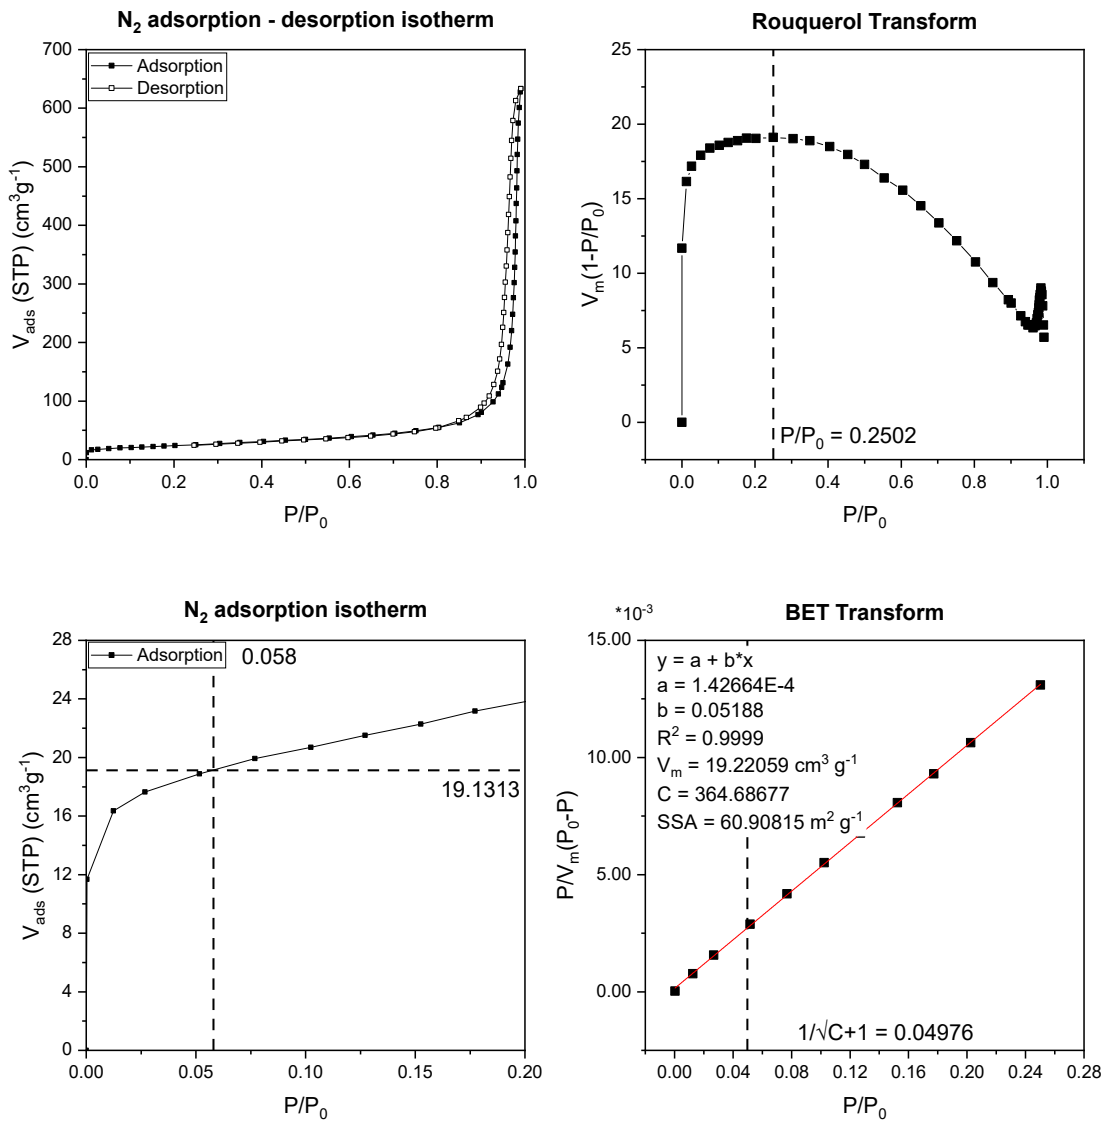

**Figure S4.** Porosity analysis of CeO<sub>2</sub> rods. a) N<sub>2</sub> adsorption and desorption isotherms at 77 K; b) Rouquerol transform plot; c) zoom-in of the N<sub>2</sub> adsorption isotherm at 77 K and d) BET transform plot.

### 3. Additional calculations surface content platinum

**Table S1.** Bulk and surface compositions of Pt<sub>1</sub>@cube, Pt<sub>1</sub>@octa and Pt<sub>1</sub>@rod.

| Catalyst              | Total Pt content (wt%) <sup>a</sup> | Surface Pt content (at%) <sup>b</sup> | SSA <sub>BET</sub> (m <sup>2</sup> g <sup>-1</sup> ) <sup>c</sup> | Surface Pt content (wt%) <sup>d</sup> | Surface Pt content (μmol g <sup>-1</sup> ) <sup>d</sup> | Average Pt <sub>1</sub> -Pt <sub>1</sub> distance (nm) <sup>d</sup> | Pt atom density (atoms per nm <sup>2</sup> ) <sup>d</sup> |
|-----------------------|-------------------------------------|---------------------------------------|-------------------------------------------------------------------|---------------------------------------|---------------------------------------------------------|---------------------------------------------------------------------|-----------------------------------------------------------|
| Pt <sub>1</sub> @cube | 0.08                                | 0.21                                  | 5                                                                 | 0.08                                  | 4.1                                                     | 1.4                                                                 | 0.494                                                     |
| Pt <sub>1</sub> @octa | 0.07                                | 0.20                                  | 8                                                                 | 0.07                                  | 3.6                                                     | 1.7                                                                 | 0.270                                                     |
| Pt <sub>1</sub> @rod  | 0.06                                | 0.04                                  | 61                                                                | 0.02                                  | 0.8                                                     | 11.0                                                                | 0.008                                                     |

<sup>a</sup> Based on XPS, <sup>b</sup> Based on ICP-OES, <sup>c</sup> Based on N<sub>2</sub> physisorption and <sup>d</sup> assuming that all Pt is present at the surface for cubes because they have the least amount of surface defects based on EPR (**Figure 1f**). Calculations are based on Eq. S1–3.

$$\theta \text{ (mol g}^{-1}\text{)} = \frac{\text{Pt loading (wt\%)}}{100 * A_r^{\circ}(\text{Pt, g mol}^{-1})} \#(S1)$$

$$d(\text{Pt}_1 - \text{Pt}_1) \text{ (nm)} = \sqrt{\frac{\text{SSA (m}^2\text{g}^{-1}\text{)} * 10^{18}}{\theta \text{ (mol g}^{-1}\text{)} * N_A}} \#(S2)$$

$$\text{Pt atoms per nm}^2 = \frac{\theta \text{ (mol g}^{-1}\text{)} * N_A}{\text{SSA (m}^2\text{g}^{-1}\text{)} * 10^{18}} \#(S3)$$

#### 4. X-ray photoelectron spectroscopy

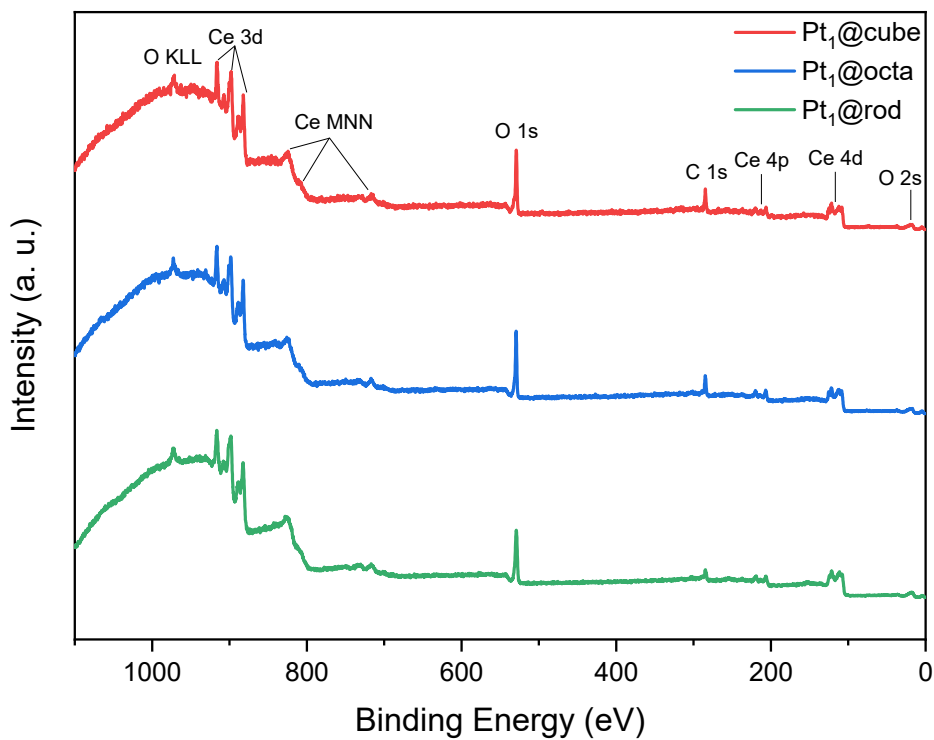

**Figure S5.** Survey XPS spectra of Pt<sub>1</sub>@cube, Pt<sub>1</sub>@octa and Pt<sub>1</sub>@rod. The peaks for Pt are only observed in detailed measurements owing to their low surface concentrations.

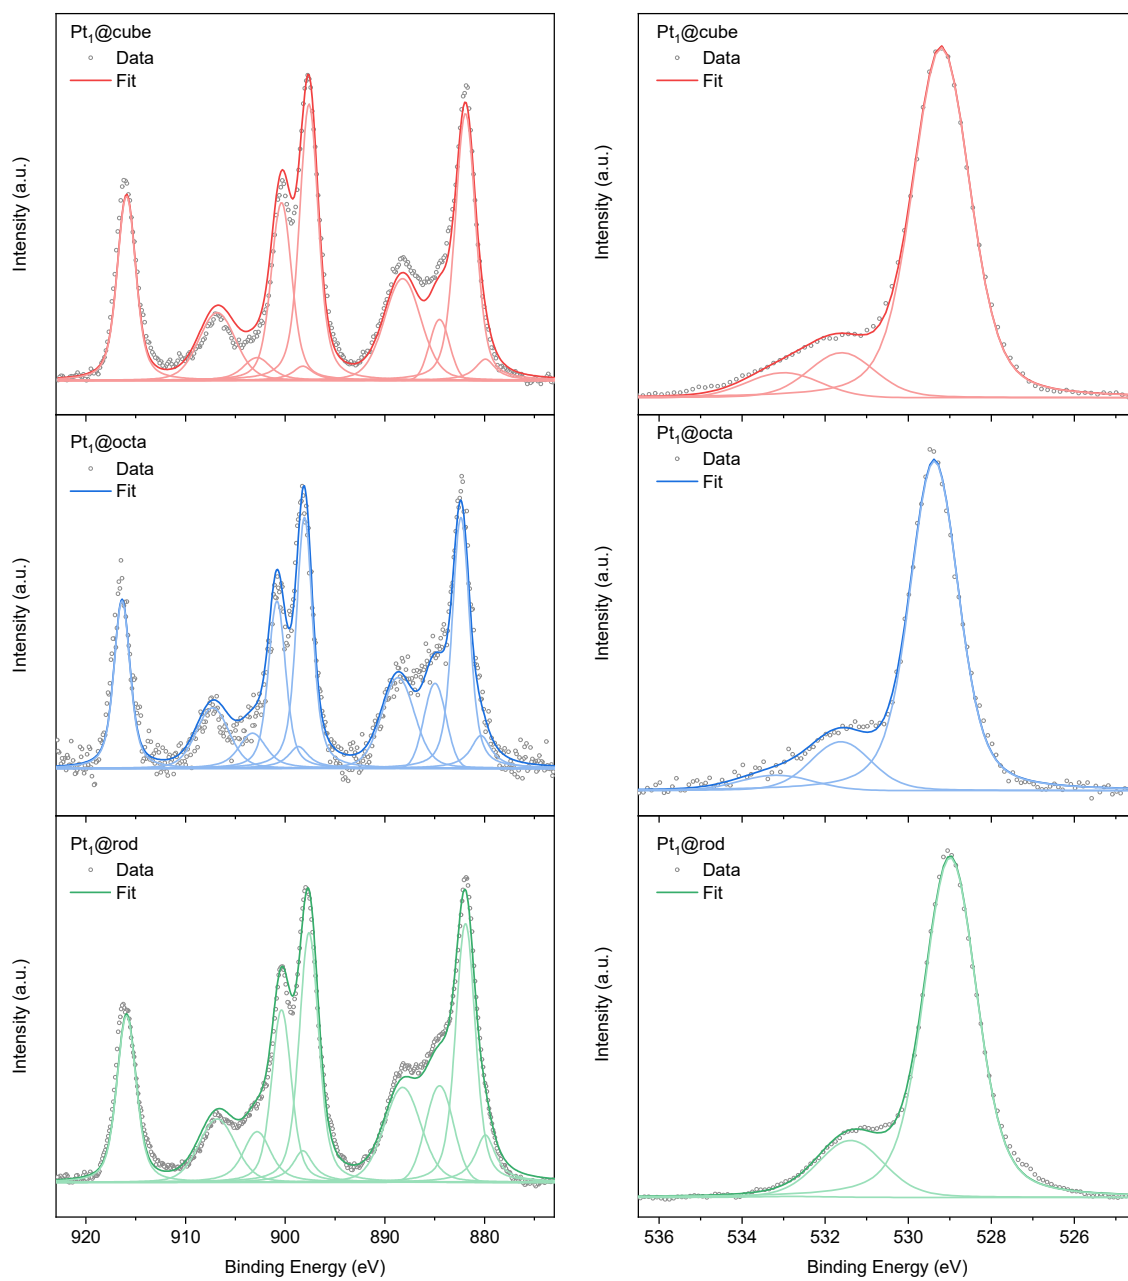

**Figure S6.** High-resolution XPS spectra of the Ce 3d region (left) and the O 1s region (right) of Pt<sub>1</sub>@cube, Pt<sub>1</sub>@octa and Pt<sub>1</sub>@rod.



**Table S2.** Surface Ce<sup>3+</sup> and O<sub>V</sub> fractions of Pt<sub>1</sub>@cube, Pt<sub>1</sub>@octa and Pt<sub>1</sub>@rod.

| <b>Catalyst</b>       | <b>Ce<sup>3+</sup>/(Ce<sup>3+</sup> + Ce<sup>4+</sup>) (%)</b> | <b>O<sub>V</sub>/(O<sub>V</sub>+O<sub>L</sub>) (%)</b> |
|-----------------------|----------------------------------------------------------------|--------------------------------------------------------|
| Pt <sub>1</sub> @cube | 10                                                             | 12                                                     |
| Pt <sub>1</sub> @octa | 18                                                             | 15                                                     |
| Pt <sub>1</sub> @rod  | 21                                                             | 16                                                     |

## 5. X-ray absorption spectroscopy

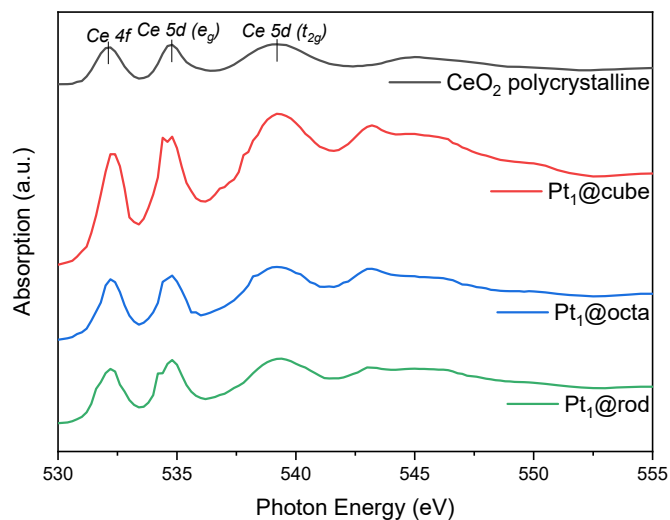

**Figure S7.** O K-edge XAS of Pt<sub>1</sub>@cube, Pt<sub>1</sub>@octa and Pt<sub>1</sub>@rod compared with polycrystalline CeO<sub>2</sub> as reference.

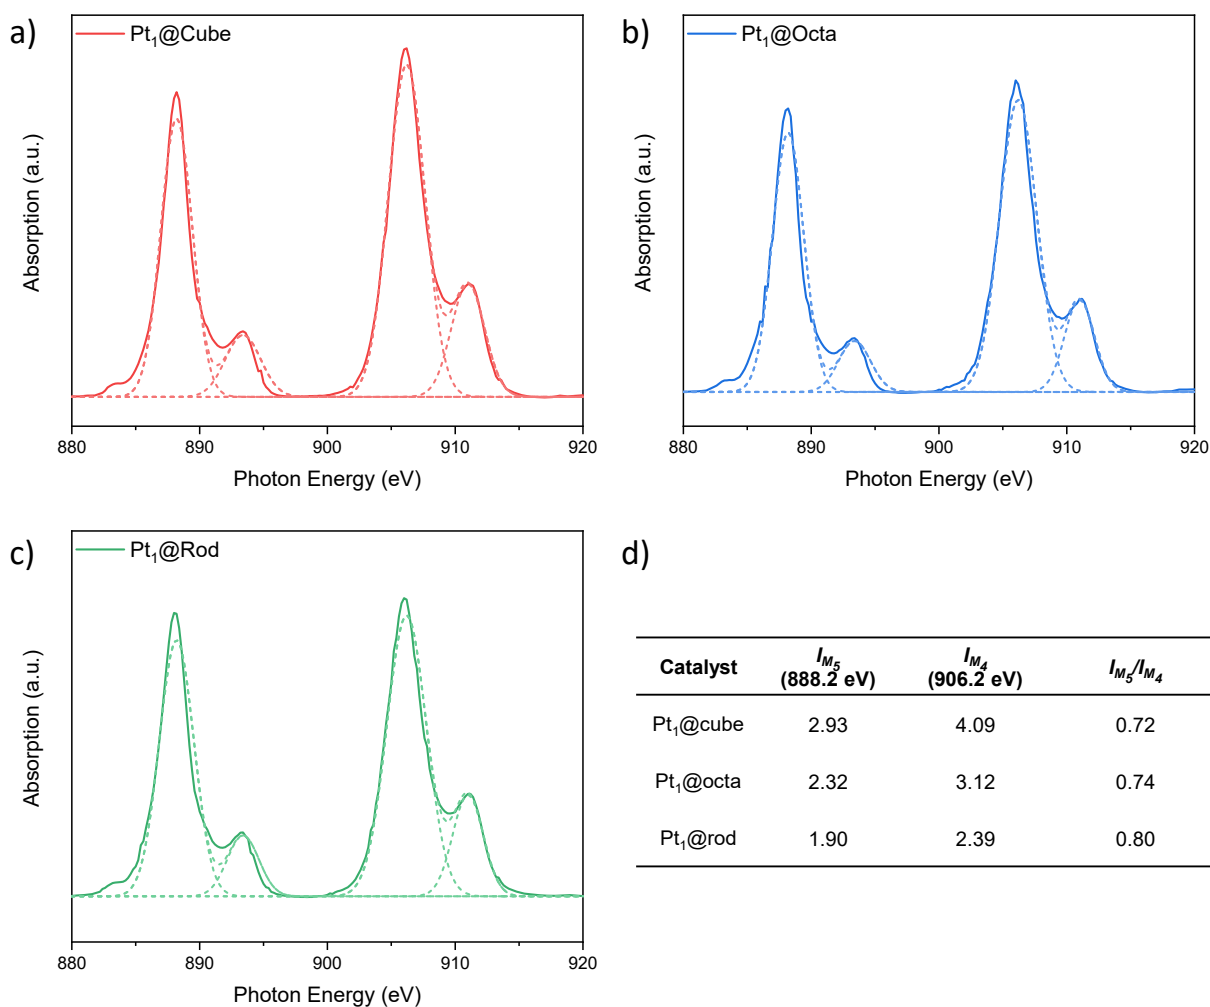

**Figure S8.** Ce M<sub>4,5</sub>-edge XAS of (a) Pt<sub>1</sub>@cube, (b) Pt<sub>1</sub>@octa, (c) Pt<sub>1</sub>@rod and (d) the integrated M<sub>5</sub> and M<sub>4</sub> areas and their respective ratios.

## 6. CO diffuse reflectance infrared Fourier transform spectroscopy

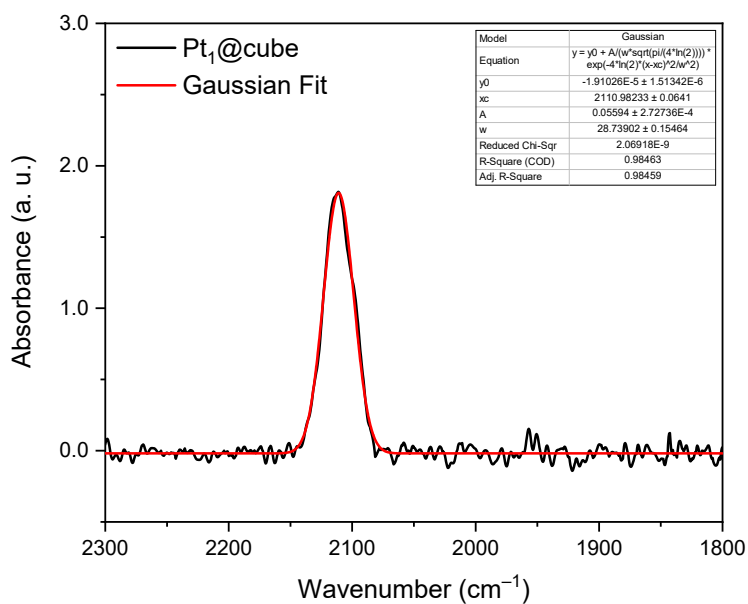

**Figure S9.** CO diffuse reflectance infrared Fourier-transform spectroscopy (CO-DRIFTS) spectrum of Pt<sub>1</sub>@cube and the corresponding Gaussian fit.

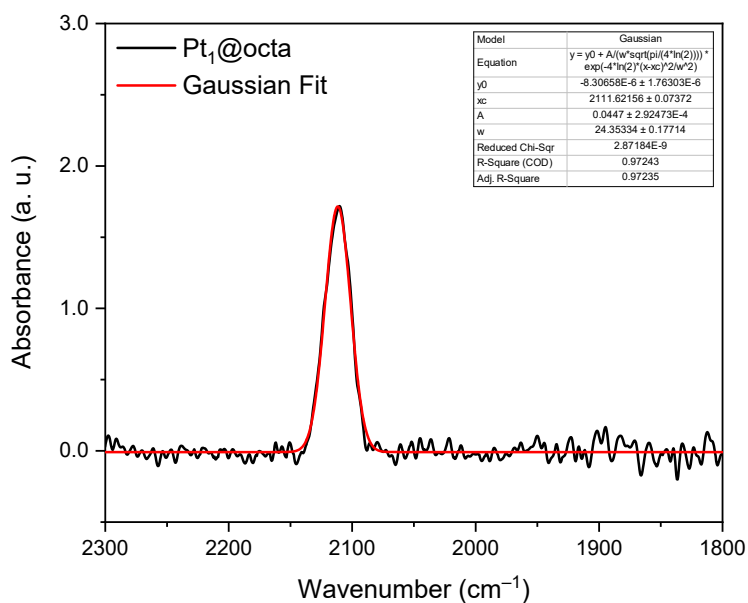

**Figure S10.** CO diffuse reflectance infrared Fourier-transform spectroscopy (CO-DRIFTS) spectrum of Pt<sub>1</sub>@octa and the corresponding Gaussian fit.

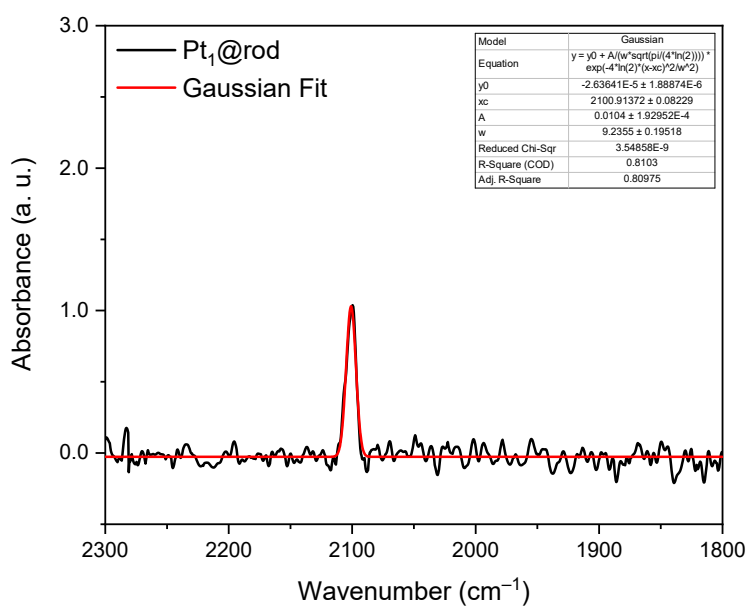

**Figure S11.** CO diffuse reflectance infrared Fourier-transform spectroscopy (CO-DRIFTS) spectrum of Pt<sub>1</sub>@rod and the corresponding Gaussian fit.

## 7. Kinetic studies of ammonia borane hydrolysis

**Table S3.** Total conversion during the non-isothermal ammonia borane hydrolysis experiments using Pt<sub>1</sub>@cube, Pt<sub>1</sub>@octa and Pt<sub>1</sub>@rod and the pure supports.

| Catalyst              | Conversion (%) |
|-----------------------|----------------|
| Cube                  | <1             |
| Pt <sub>1</sub> @cube | 14             |
| Octa                  | <1             |
| Pt <sub>1</sub> @octa | 18             |
| Rod                   | <1             |
| Pt <sub>1</sub> @rod  | 3              |

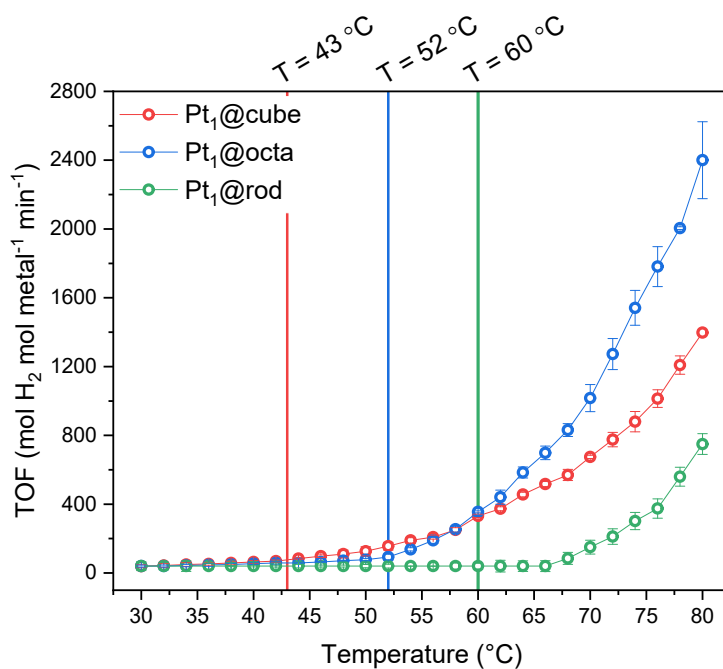

**Figure S12.** Turnover frequency (TOF) at various temperatures for the hydrolysis of ammonia borane catalyzed by Pt<sub>1</sub>@cube, Pt<sub>1</sub>@octa and Pt<sub>1</sub>@rod. Each data point represents a window average of 10–50 measurements using equal time interpolation and all experiments were performed in duplo. The data shown here indicates the averaged values and the error bars indicate a 95% confidence interval. The vertical lines indicate the temperatures at which the corresponding Arrhenius plot show a kink (**Figure 3**).

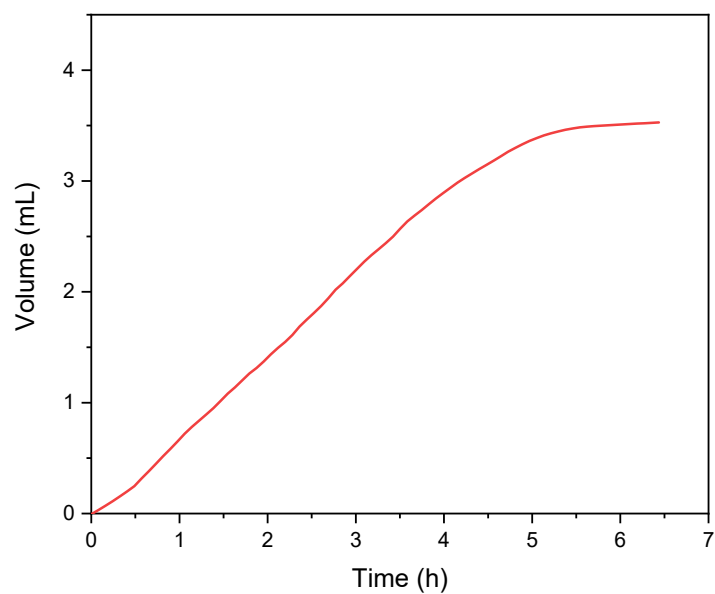

**Figure S13.** Kinetic profile of Pt<sub>1</sub>@cube catalyzed ammonia borane hydrolysis at 40 °C based on ca. 400 data points.

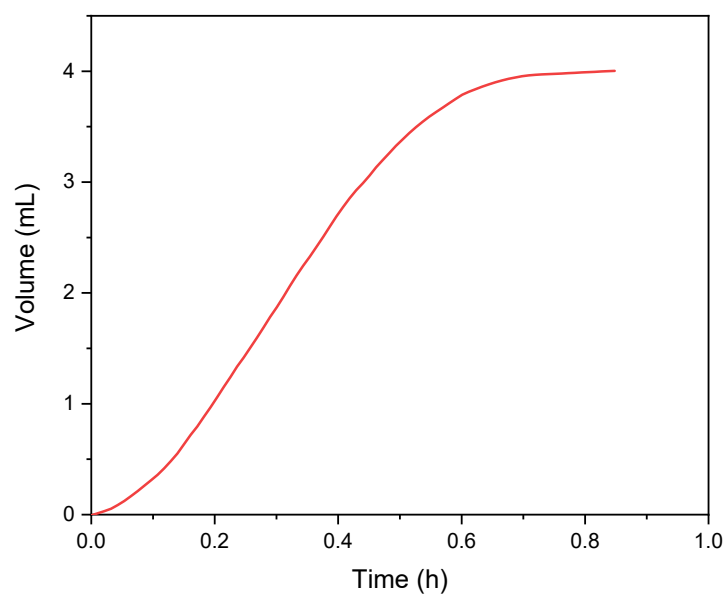

**Figure S14.** Kinetic profile of Pt<sub>1</sub>@cube catalyzed ammonia borane hydrolysis at 65 °C based on ca. 400 data points.

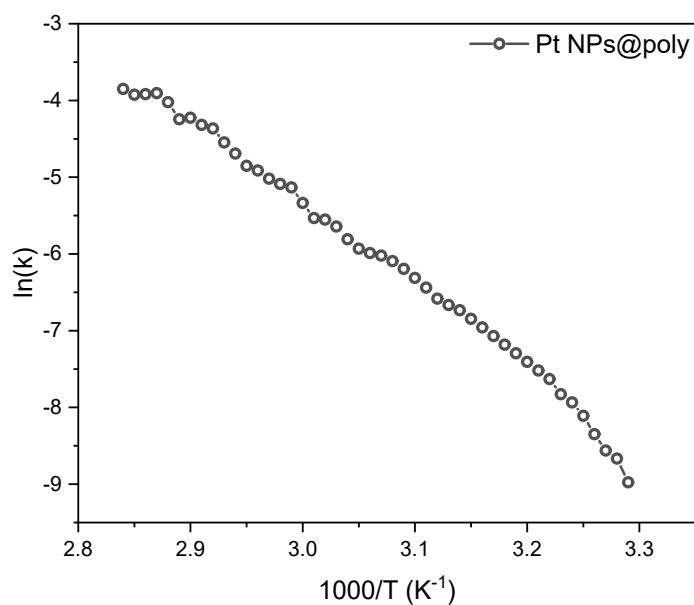

**Figure S15.** Arrhenius plot of platinum nanoparticles supported on polycrystalline cerium dioxide in the hydrolysis of ammonia borane. Each data point represents a window average of 30 individual measurements.

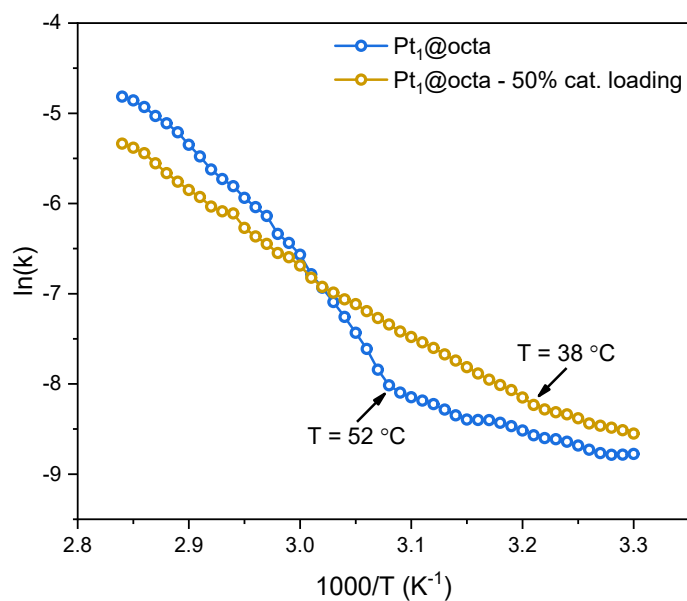

**Figure S16.** Arrhenius plots of  $\text{Pt}_1@octa$  and  $\text{Pt}_1@octa$  at 50% catalyst loading in the hydrolysis of ammonia borane. Each data point represents a window average of 30 individual measurements. All experiments were performed in duplo and the data shown here represent the averaged values.

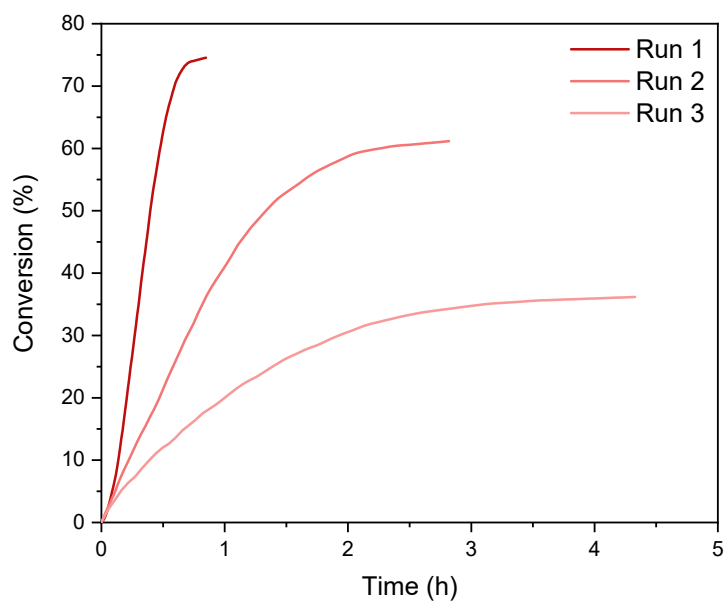

**Figure S17.** Kinetic profiles of Pt<sub>1</sub>@cube catalysed ammonia borane hydrolysis for three consecutive runs.

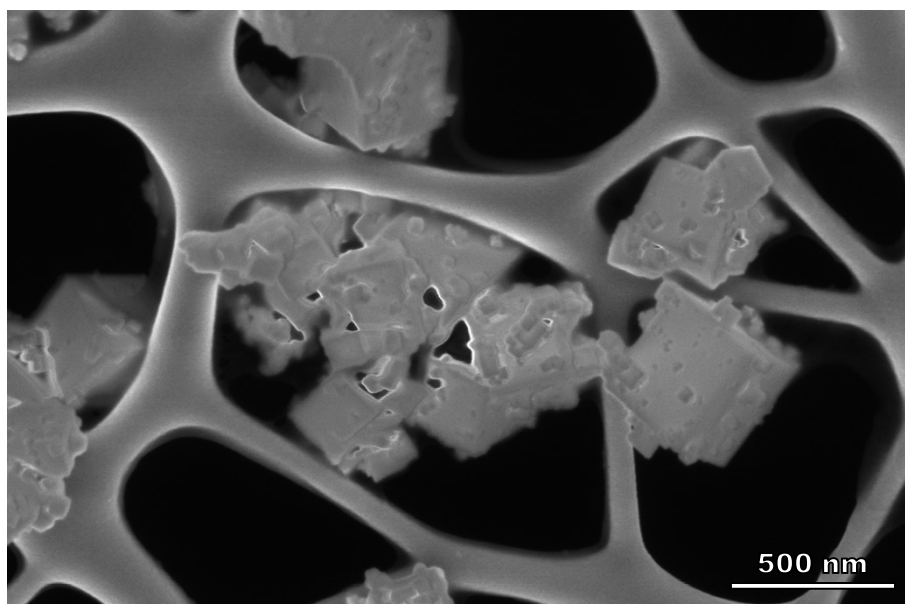

**Figure S18.** Scanning electron microscope (SEM) images of spent Pt<sub>1</sub>@cube showing deposition of the metaborate salts, which is absent before the reaction (*cf.* **Figure S1**).
